# Supplementary material for: Immobilization of Ophiopogonin D on stainless steel surfaces for improving surface endothelialization
Source: Royal Society of Chemistry journal article supplement (doi:10.1039/c6ra17584h), 2016-01-01
Supplement: c6ra17584h1.pdf [file c6ra17584h1.pdf]

## Supporting online information

### Immobilization of Ophiopogonin D on stainless steel surfaces for improving surface endothelialization

Kun Zhang<sup>a,c,d</sup> , Xiaofeng Wang<sup>c</sup>, Fangxia Guan<sup>a</sup>, Qian Li<sup>c</sup> and Jingan  
Li<sup>b,c,d,\*</sup>

<sup>a</sup> School of Life Science, Zhengzhou University, 100 Science Road, Zhengzhou 450001, PR China.

<sup>b</sup> School of Material Science and Engineering, Zhengzhou University, 100 Science Road,  
Zhengzhou 450001, PR China.

<sup>c</sup> National Center for International Research of Micro-nano Molding Technology & Key  
Laboratory for Micro Molding Technology of Henan Province, 100 Science Road, Zhengzhou  
450001, PR China.

<sup>d</sup> Key Lab. for Advanced Technologies of Materials, Ministry of Education, School of Material  
Science and Engineering, Southwest Jiaotong University, Chengdu 610031, PR China.

\*Corresponding author: Tel: +86-13551284797.

E-mail addresses: 4828713@qq.com (Jingan Li).

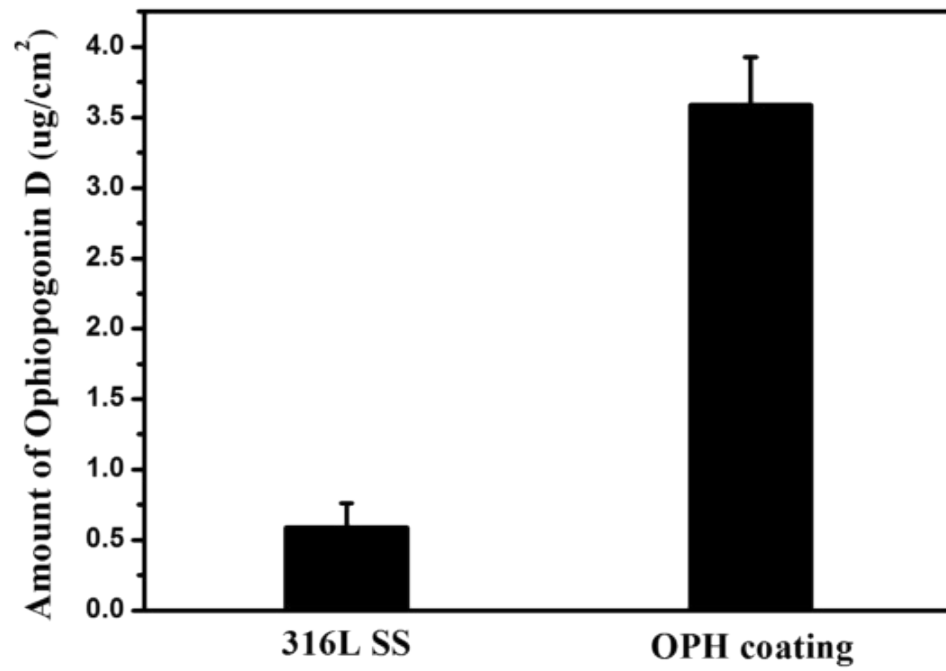

**Figure S1.** Quantitative characterization of Ophiopogonin D on each samples (mean $\pm$ SD, n=5)

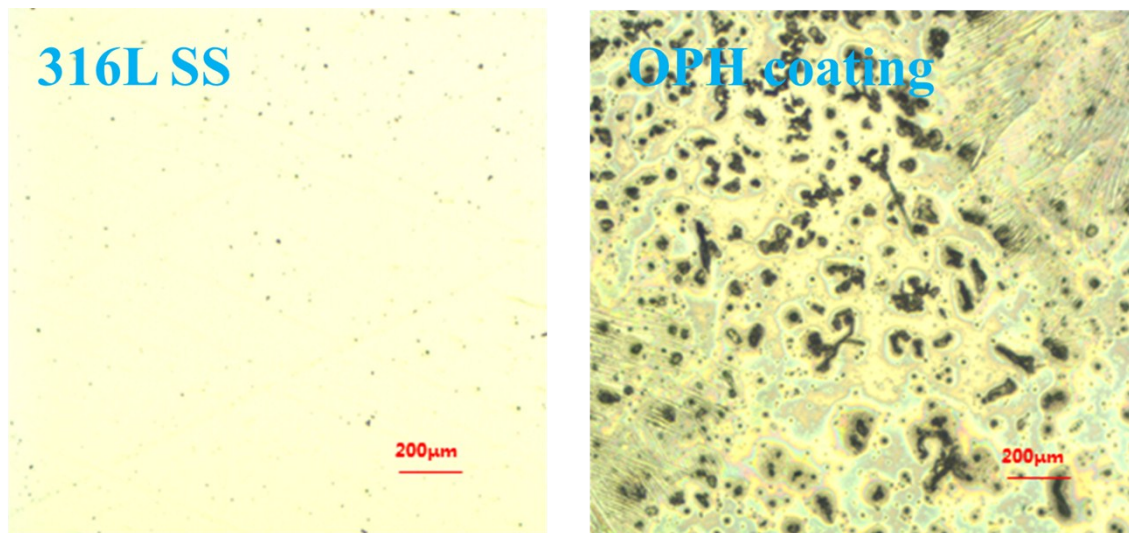

**Figure S2.** Optical microscopy images of OPH coating and 316L SS.
